# Supplementary material
Source: Springer Nature journal article supplement (https://www.springermedizin.de/resource/supplementary/13047_2013_573_MOESM4_ESM.pdf/9663996)
Supplement: MOESM4 [file 9663996]

| Study ID       | Effect | 95% CI |       |
|----------------|--------|--------|-------|
|                |        | Lower  | Upper |
| Lavery 2007a   | 4.48   | -0.34  | 9.30  |
| Lavery 2007b   | 4.71   | -0.37  | 9.79  |
| Armstrong 2007 | 3.00   | -0.21  | 6.21  |
| Lavery 2004    | 8.00   | -6.64  | 22.64 |

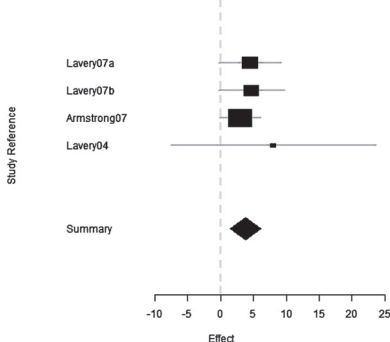

Summary effect: 3.84, 95% CI (1.50, 6.17)  
 Estimated heterogeneity variance:  $p = 0.86$
